# Supplementary material for: Unmet needs in non-metastatic castration-resistant prostate cancer from the Japanese patient perspective: a discrete choice experiment
Source: HighWire-hosted journal article supplement (doi:10.1136/bmjopen-2021-052471), 2021-08-01
Supplement: bmjopen-2021-052471supp001_data_supplement.pdf [file bmjopen-2021-052471supp001_data_supplement.pdf]

## Supplementary material

### Supplementary figure 1 Relative importance of treatment attributes: patients vs. physicians.

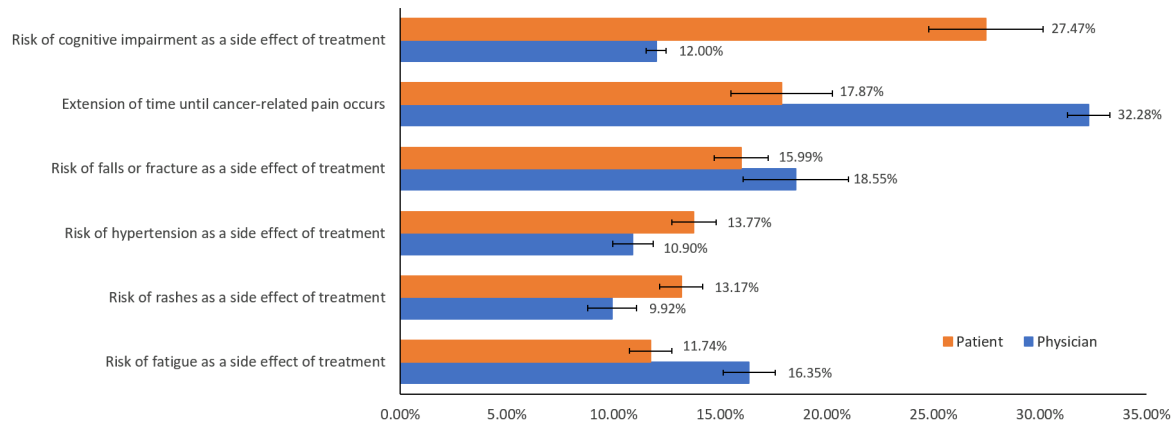

**Supplementary table 1** Patient-reported demographics and other baseline characteristics.

|                                                            |                                                        | <b>Total<br/>(N = 137)</b> |          |
|------------------------------------------------------------|--------------------------------------------------------|----------------------------|----------|
|                                                            |                                                        | <b>N</b>                   | <b>%</b> |
| Age [year] Category                                        | <60                                                    | 5                          | 3.65%    |
|                                                            | 60-<70                                                 | 20                         | 14.60%   |
|                                                            | 70-<80                                                 | 65                         | 47.45%   |
|                                                            | 80-<90                                                 | 43                         | 31.39%   |
|                                                            | ≥90                                                    | 3                          | 2.19%    |
| Marital status                                             | Single                                                 | 6                          | 4.38%    |
|                                                            | Married                                                | 115                        | 83.94%   |
|                                                            | Divorced                                               | 2                          | 1.46%    |
|                                                            | Separated                                              | 1                          | 0.73%    |
|                                                            | Widowed                                                | 10                         | 7.30%    |
|                                                            | Living with partner                                    | 2                          | 1.46%    |
| Level of education                                         | Elementary school                                      | 0                          | 0.00%    |
|                                                            | Junior high school                                     | 23                         | 16.79%   |
|                                                            | High school                                            | 50                         | 36.50%   |
|                                                            | 2-year college                                         | 4                          | 2.92%    |
|                                                            | 4-year college                                         | 54                         | 39.42%   |
|                                                            | Graduate school                                        | 4                          | 2.92%    |
|                                                            | Decline to answer                                      | 1                          | 0.73%    |
| Employment status                                          | Employed full-time                                     | 18                         | 13.14%   |
|                                                            | Self-employed                                          | 17                         | 12.41%   |
|                                                            | Part-time employed                                     | 6                          | 4.38%    |
|                                                            | Retired                                                | 62                         | 45.26%   |
|                                                            | Long-term disability                                   | 0                          | 0.00%    |
|                                                            | Short-term disability                                  | 0                          | 0.00%    |
|                                                            | Not employed (other than retired)                      | 33                         | 24.09%   |
| Region of residence                                        | Chubu                                                  | 1                          | 0.73%    |
|                                                            | Kanto                                                  | 105                        | 76.64%   |
|                                                            | Kyushu (including Okinawa)                             | 30                         | 21.90%   |
| Household income                                           | Less than ¥2,500,000                                   | 28                         | 20.44%   |
|                                                            | 2,500,000 to ¥4,999,999                                | 57                         | 41.61%   |
|                                                            | ¥5,000,000 to ¥7,499,999                               | 14                         | 10.22%   |
|                                                            | ¥7,500,000 to ¥9,999,999                               | 6                          | 4.38%    |
|                                                            | ¥10,000,000 to ¥12,499,999                             | 3                          | 2.19%    |
|                                                            | ¥12,500,000 to ¥14,999,999                             | 3                          | 2.19%    |
|                                                            | ¥15,000,000 or more                                    | 2                          | 1.46%    |
|                                                            | Decline to answer                                      | 23                         | 16.79%   |
| Type of medical insurance                                  | National health insurance                              | 40                         | 29.20%   |
|                                                            | Late stage elderly insurance                           | 76                         | 55.47%   |
|                                                            | Company/Social insurance                               | 18                         | 13.14%   |
|                                                            | Welfare recipient                                      | 2                          | 1.46%    |
|                                                            | None of the above (all costs paid by myself/my family) | 0                          | 0.00%    |
| Currently cared by a primary caregiver for prostate cancer | Yes                                                    | 7                          | 5.11%    |
|                                                            | No                                                     | 129                        | 94.16%   |
| Primary caregiver relationship                             | Wife                                                   | 4                          | 57.14%   |
|                                                            | Child                                                  | 1                          | 14.29%   |

|                                        |                                                                                        |             |        |
|----------------------------------------|----------------------------------------------------------------------------------------|-------------|--------|
|                                        | Grandchild                                                                             | 0           | 0.00%  |
|                                        | Sibling                                                                                | 0           | 0.00%  |
|                                        | Other relative (parent, niece/nephew)                                                  | 0           | 0.00%  |
|                                        | Hired professional caregiver                                                           | 2           | 28.57% |
|                                        | Other non-relative                                                                     | 0           | 0.00%  |
| Physician-diagnosed comorbid condition | Cardiovascular disease                                                                 | 19          | 13.87% |
|                                        | Chronic pulmonary disease                                                              | 3           | 2.19%  |
|                                        | Rheumatologic disease                                                                  | 1           | 0.73%  |
|                                        | Peptic ulcer disease                                                                   | 16          | 11.68% |
|                                        | Mild liver disease                                                                     | 13          | 9.49%  |
|                                        | Diabetes without chronic complications                                                 | 16          | 11.68% |
|                                        | Diabetes with chronic complications                                                    | 5           | 3.65%  |
|                                        | Hemiplegia or paraplegia                                                               | 1           | 0.73%  |
|                                        | Renal disease                                                                          | 4           | 2.92%  |
|                                        | Any malignancy, including leukemia and lymphoma                                        | 1           | 0.73%  |
|                                        | Moderate or severe liver disease                                                       | 1           | 0.73%  |
|                                        | Other metastatic solid tumor currently being treated (other than that of the prostate) | 1           | 0.73%  |
|                                        | AIDS/HIV                                                                               | 0           | 0.00%  |
|                                        | Hypertension                                                                           | 58          | 42.34% |
|                                        | Prior malignancy, now in remission (malignancy other than that of the prostate)        | 10          | 7.30%  |
|                                        | None of the above                                                                      | 51          | 37.23% |
|                                        |                                                                                        | <b>Mean</b> |        |
| Age                                    |                                                                                        | 75.8        | 7.5    |

**Supplementary table 2** List of attributes and levels in DCE

| Attributes                                                      | Levels                                                                                              |
|-----------------------------------------------------------------|-----------------------------------------------------------------------------------------------------|
| i. Risk of fatigue as a side-effect of treatment                | <ul style="list-style-type: none"><li>• 15%</li><li>• 25%</li><li>• 35%</li></ul>                   |
| ii. Risk of falls or fractures as a side-effect of treatment    | <ul style="list-style-type: none"><li>• 3%</li><li>• 10%</li><li>• 20%</li></ul>                    |
| iii. Risk of cognitive impairment as a side-effect of treatment | <ul style="list-style-type: none"><li>• 0%</li><li>• 5%</li><li>• 10%</li></ul>                     |
| iv. Risk of hypertension as a side-effect of treatment          | <ul style="list-style-type: none"><li>• 5%</li><li>• 15%</li><li>• 25%</li></ul>                    |
| v. Extension of time until cancer-related pain occurs           | <ul style="list-style-type: none"><li>• 15 months</li><li>• 35 months</li><li>• 45 months</li></ul> |
| vi. Risk of rashes as a side-effect of treatment                | <ul style="list-style-type: none"><li>• 5%</li><li>• 15%</li><li>• 25%</li></ul>                    |

**Supplementary table 3** Attribute-level preference weights: overall sample (N=137)

| Attribute                                                  | Levels    | Mean preference weight | SE    | 95% CI         | p-value |
|------------------------------------------------------------|-----------|------------------------|-------|----------------|---------|
| Risk of fatigue as a side-effect of treatment              | 15%       | 0.633                  | 0.035 | 0.564, 0.703   | <0.001  |
|                                                            | 25%       | 0.034                  | 0.013 | 0.009, 0.059   | 0.009   |
|                                                            | 35%       | -0.667                 | 0.043 | -0.752, -0.582 | <0.001  |
| Risk of falls or fracture as a side-effect of treatment    | 3%        | 0.802                  | 0.057 | 0.691, 0.913   | <0.001  |
|                                                            | 10%       | 0.136                  | 0.013 | 0.110, 0.161   | <0.001  |
|                                                            | 20%       | -0.938                 | 0.054 | -1.044, -0.831 | <0.001  |
| Risk of cognitive impairment as a side-effect of treatment | 0%        | 1.385                  | 0.058 | 1.271, 1.498   | <0.001  |
|                                                            | 5%        | 0.035                  | 0.012 | 0.012, 0.059   | 0.005   |
|                                                            | 10%       | -1.420                 | 0.056 | -1.530, -1.310 | <0.001  |
| Risk of hypertension as a side-effect of treatment         | 5%        | 0.642                  | 0.024 | 0.595, 0.689   | <0.001  |
|                                                            | 15%       | 0.210                  | 0.018 | 0.173, 0.246   | <0.001  |
|                                                            | 25%       | -0.852                 | 0.037 | -0.925, -0.779 | <0.001  |
| Extension of time until cancer-related pain occurs         | 15 months | -0.933                 | 0.068 | -1.066, -0.799 | <0.001  |
|                                                            | 35 months | 0.281                  | 0.015 | 0.252, 0.309   | <0.001  |
|                                                            | 45 months | 0.652                  | 0.064 | 0.526, 0.778   | <0.001  |
| Risk of rashes as a side-effect of treatment               | 5%        | 0.705                  | 0.050 | 0.606, 0.803   | <0.001  |
|                                                            | 15%       | -0.056                 | 0.016 | -0.088, -0.024 | <0.001  |
|                                                            | 25%       | -0.648                 | 0.051 | -0.749, -0.548 | <0.001  |

Supplementary table 4 Differences in preference weights across demographic and health history factors

|                                                            | N                              | Risk of fatigue as a side-effect of treatment |       |       | Risk of falls or fracture as a side-effect of treatment |       |       | Risk of cognitive impairment as a side-effect of treatment |       |        | Risk of hypertension as a side-effect of treatment |       |       | Extension of time until cancer-related pain occurs |           |           | Risk of rashes as a side-effect of treatment |       |        |        |
|------------------------------------------------------------|--------------------------------|-----------------------------------------------|-------|-------|---------------------------------------------------------|-------|-------|------------------------------------------------------------|-------|--------|----------------------------------------------------|-------|-------|----------------------------------------------------|-----------|-----------|----------------------------------------------|-------|--------|--------|
|                                                            |                                | 15%                                           | 25%   | 35%   | 3%                                                      | 10%   | 20%   | 0%                                                         | 5%    | 10%    | 5%                                                 | 15%   | 25%   | 15 months                                          | 35 months | 45 months | 5%                                           | 15%   | 25%    |        |
| Age group                                                  | <60                            | 5                                             | 0.468 | 0.045 | -0.513                                                  | 0.429 | 0.123 | -0.552                                                     | 1.453 | -0.083 | -1.370                                             | 0.545 | 0.124 | -0.669                                             | -1.220    | 0.251     | 0.969                                        | 0.409 | -0.093 | -0.316 |
|                                                            | 60-<70                         | 20                                            | 0.617 | 0.024 | -0.641                                                  | 0.755 | 0.170 | -0.925                                                     | 1.465 | 0.007  | -1.472                                             | 0.646 | 0.174 | -0.820                                             | -1.015    | 0.274     | 0.741                                        | 0.728 | -0.078 | -0.651 |
|                                                            | 70-<80                         | 65                                            | 0.620 | 0.021 | -0.641                                                  | 0.789 | 0.138 | -0.927                                                     | 1.362 | 0.055  | -1.417                                             | 0.657 | 0.183 | -0.840                                             | -0.999    | 0.283     | 0.716                                        | 0.736 | -0.037 | -0.700 |
|                                                            | ≥80                            | 46                                            | 0.691 | 0.059 | -0.750                                                  | 0.897 | 0.116 | -1.013                                                     | 1.353 | 0.031  | -1.384                                             | 0.635 | 0.273 | -0.908                                             | -0.775    | 0.283     | 0.492                                        | 0.690 | -0.074 | -0.616 |
|                                                            | p-value                        |                                               | 0.621 | 0.602 | 0.595                                                   | 0.455 | 0.621 | 0.479                                                      | 0.922 | 0.119  | 0.966                                              | 0.849 | 0.096 | 0.625                                              | 0.380     | 0.978     | 0.297                                        | 0.683 | 0.689  | 0.548  |
| Marital status                                             | Married / Living with partner  | 117                                           | 0.646 | 0.034 | -0.680                                                  | 0.827 | 0.135 | -0.961                                                     | 1.373 | 0.043  | -1.415                                             | 0.644 | 0.203 | -0.848                                             | -0.948    | 0.284     | 0.664                                        | 0.732 | -0.060 | -0.672 |
|                                                            | Not                            | 20                                            | 0.586 | 0.043 | -0.629                                                  | 0.686 | 0.135 | -0.822                                                     | 1.407 | -0.012 | -1.395                                             | 0.642 | 0.249 | -0.891                                             | -0.846    | 0.260     | 0.586                                        | 0.558 | -0.040 | -0.518 |
|                                                            | p-value                        |                                               | 0.558 | 0.797 | 0.687                                                   | 0.394 | 0.980 | 0.377                                                      | 0.837 | 0.113  | 0.902                                              | 0.975 | 0.396 | 0.690                                              | 0.608     | 0.568     | 0.679                                        | 0.234 | 0.681  | 0.303  |
| Level of education                                         | Completed university education | 62                                            | 0.628 | 0.029 | -0.657                                                  | 0.785 | 0.141 | -0.925                                                     | 1.423 | 0.035  | -1.457                                             | 0.625 | 0.219 | -0.844                                             | -0.899    | 0.290     | 0.609                                        | 0.699 | -0.053 | -0.646 |
|                                                            | Not                            | 75                                            | 0.647 | 0.040 | -0.686                                                  | 0.826 | 0.130 | -0.956                                                     | 1.339 | 0.035  | -1.375                                             | 0.659 | 0.202 | -0.862                                             | -0.963    | 0.273     | 0.690                                        | 0.715 | -0.061 | -0.654 |
|                                                            | p-value                        |                                               | 0.790 | 0.677 | 0.733                                                   | 0.721 | 0.681 | 0.784                                                      | 0.476 | 0.970  | 0.467                                              | 0.487 | 0.656 | 0.820                                              | 0.640     | 0.566     | 0.532                                        | 0.879 | 0.821  | 0.939  |
| Employment status                                          | Employed                       | 41                                            | 0.706 | 0.047 | -0.753                                                  | 0.879 | 0.149 | -1.028                                                     | 1.358 | 0.024  | -1.382                                             | 0.667 | 0.228 | -0.895                                             | -0.994    | 0.279     | 0.714                                        | 0.740 | -0.058 | -0.682 |
|                                                            | Not employed                   | 96                                            | 0.609 | 0.030 | -0.638                                                  | 0.776 | 0.128 | -0.905                                                     | 1.386 | 0.040  | -1.426                                             | 0.634 | 0.202 | -0.836                                             | -0.908    | 0.281     | 0.627                                        | 0.694 | -0.057 | -0.636 |
|                                                            | p-value                        |                                               | 0.211 | 0.533 | 0.228                                                   | 0.409 | 0.476 | 0.301                                                      | 0.824 | 0.555  | 0.723                                              | 0.532 | 0.531 | 0.476                                              | 0.569     | 0.945     | 0.536                                        | 0.675 | 0.989  | 0.685  |
| Household income                                           | Less than ¥5,000,000           | 85                                            | 0.644 | 0.037 | -0.681                                                  | 0.817 | 0.148 | -0.965                                                     | 1.413 | 0.038  | -1.451                                             | 0.642 | 0.220 | -0.862                                             | -0.849    | 0.284     | 0.566                                        | 0.699 | -0.051 | -0.647 |
|                                                            | ¥5,000,000 to ¥9,999,999       | 20                                            | 0.660 | 0.062 | -0.722                                                  | 0.786 | 0.080 | -0.866                                                     | 1.263 | 0.019  | -1.282                                             | 0.699 | 0.267 | -0.966                                             | -0.917    | 0.248     | 0.669                                        | 0.682 | -0.040 | -0.642 |
|                                                            | ¥10,000,000 or more            | 8                                             | 0.797 | 0.019 | -0.816                                                  | 1.191 | 0.090 | -1.281                                                     | 0.975 | 0.115  | -1.090                                             | 0.669 | 0.150 | -0.819                                             | -1.453    | 0.398     | 1.055                                        | 0.864 | -0.148 | -0.717 |
|                                                            | Decline to answer              | 24                                            | 0.540 | 0.010 | -0.550                                                  | 0.656 | 0.150 | -0.807                                                     | 1.486 | 0.010  | -1.497                                             | 0.595 | 0.144 | -0.738                                             | -1.080    | 0.258     | 0.823                                        | 0.707 | -0.063 | -0.644 |
|                                                            | p-value                        |                                               | 0.468 | 0.701 | 0.533                                                   | 0.274 | 0.253 | 0.297                                                      | 0.237 | 0.297  | 0.335                                              | 0.677 | 0.227 | 0.393                                              | 0.164     | 0.177     | 0.206                                        | 0.893 | 0.571  | 0.991  |
| Type of medical insurance                                  | National health insurance      | 40                                            | 0.605 | 0.022 | -0.627                                                  | 0.746 | 0.137 | -0.883                                                     | 1.408 | 0.044  | -1.452                                             | 0.628 | 0.196 | -0.824                                             | -0.989    | 0.272     | 0.718                                        | 0.685 | -0.026 | -0.659 |
|                                                            | Late stage elderly insurance   | 76                                            | 0.677 | 0.040 | -0.717                                                  | 0.875 | 0.129 | -1.004                                                     | 1.348 | 0.047  | -1.396                                             | 0.648 | 0.226 | -0.874                                             | -0.879    | 0.294     | 0.586                                        | 0.731 | -0.070 | -0.662 |
|                                                            | Company/Social insurance       | 18                                            | 0.505 | 0.009 | -0.513                                                  | 0.587 | 0.163 | -0.749                                                     | 1.484 | -0.029 | -1.455                                             | 0.634 | 0.158 | -0.793                                             | -1.095    | 0.252     | 0.843                                        | 0.592 | -0.067 | -0.525 |
|                                                            | Welfare recipient              | 2                                             | 1.017 | 0.342 | -1.359                                                  | 1.428 | 0.058 | -1.486                                                     | 0.904 | -0.023 | -0.880                                             | 0.894 | 0.343 | -1.236                                             | -0.445    | 0.225     | 0.221                                        | 1.292 | -0.125 | -1.167 |
|                                                            | p-value                        |                                               | 0.214 | 0.022 | 0.094                                                   | 0.181 | 0.749 | 0.245                                                      | 0.651 | 0.175  | 0.666                                              | 0.635 | 0.505 | 0.531                                              | 0.573     | 0.737     | 0.444                                        | 0.418 | 0.645  | 0.518  |
| Currently cared by a primary caregiver for prostate cancer | Yes                            | 7                                             | 0.665 | 0.058 | -0.723                                                  | 0.815 | 0.046 | -0.861                                                     | 1.137 | 0.071  | -1.208                                             | 0.582 | 0.301 | -0.883                                             | -1.021    | 0.307     | 0.714                                        | 0.575 | -0.062 | -0.513 |
|                                                            | No                             | 129                                           | 0.636 | 0.034 | -0.670                                                  | 0.807 | 0.139 | -0.946                                                     | 1.390 | 0.033  | -1.424                                             | 0.647 | 0.205 | -0.852                                             | -0.929    | 0.279     | 0.650                                        | 0.715 | -0.057 | -0.658 |
|                                                            | p-value                        |                                               | 0.858 | 0.678 | 0.789                                                   | 0.975 | 0.116 | 0.731                                                      | 0.334 | 0.480  | 0.398                                              | 0.551 | 0.254 | 0.858                                              | 0.769     | 0.681     | 0.827                                        | 0.542 | 0.944  | 0.536  |

|                                            |              |     |       |        |        |       |       |        |       |       |        |       |       |        |        |       |       |       |        |        |
|--------------------------------------------|--------------|-----|-------|--------|--------|-------|-------|--------|-------|-------|--------|-------|-------|--------|--------|-------|-------|-------|--------|--------|
| Duration of prostate cancer (median split) | ≤5 years     | 76  | 0.619 | 0.024  | -0.643 | 0.808 | 0.135 | -0.943 | 1.365 | 0.035 | -1.401 | 0.635 | 0.197 | -0.832 | -0.994 | 0.295 | 0.699 | 0.700 | -0.067 | -0.633 |
|                                            | >5 years     | 60  | 0.662 | 0.049  | -0.711 | 0.806 | 0.135 | -0.941 | 1.393 | 0.035 | -1.427 | 0.655 | 0.226 | -0.882 | -0.858 | 0.262 | 0.596 | 0.717 | -0.045 | -0.672 |
|                                            | p-value      |     | 0.553 | 0.337  | 0.443  | 0.984 | 0.990 | 0.986  | 0.815 | 0.969 | 0.815  | 0.676 | 0.427 | 0.508  | 0.327  | 0.270 | 0.431 | 0.867 | 0.511  | 0.709  |
| ECOG grade at study enrolment              | Grade 0      | 105 | 0.631 | 0.027  | -0.658 | 0.811 | 0.135 | -0.946 | 1.373 | 0.036 | -1.409 | 0.639 | 0.205 | -0.844 | -0.973 | 0.282 | 0.690 | 0.719 | -0.058 | -0.661 |
|                                            | Grade 1      | 31  | 0.662 | 0.062  | -0.724 | 0.796 | 0.132 | -0.928 | 1.392 | 0.031 | -1.423 | 0.661 | 0.227 | -0.888 | -0.802 | 0.275 | 0.527 | 0.669 | -0.056 | -0.613 |
|                                            | p-value      |     | 0.718 | 0.252  | 0.528  | 0.915 | 0.922 | 0.893  | 0.888 | 0.847 | 0.917  | 0.701 | 0.609 | 0.617  | 0.299  | 0.830 | 0.293 | 0.680 | 0.970  | 0.695  |
| Symptomatic status at study enrolment      | Symptomatic  | 3   | 0.853 | -0.081 | -0.772 | 0.979 | 0.097 | -1.076 | 0.755 | 0.081 | -0.836 | 0.547 | 0.124 | -0.671 | -1.990 | 0.252 | 1.739 | 1.039 | -0.210 | -0.829 |
|                                            | Asymptomatic | 133 | 0.633 | 0.038  | -0.671 | 0.803 | 0.136 | -0.939 | 1.391 | 0.034 | -1.425 | 0.646 | 0.212 | -0.858 | -0.910 | 0.281 | 0.629 | 0.700 | -0.054 | -0.646 |
|                                            | p-value      |     | 0.364 | 0.171  | 0.734  | 0.651 | 0.667 | 0.713  | 0.107 | 0.563 | 0.123  | 0.548 | 0.489 | 0.465  | 0.020  | 0.768 | 0.011 | 0.324 | 0.165  | 0.603  |

**Supplementary table 5** Regression coefficients for preference weights and HRQoL sub-scale scores

|                                                    | N   | Risk of fatigue as a side-effect of treatment |        |        | Risk of falls or fracture as a side-effect of treatment |        |        | Risk of cognitive impairment as a side-effect of treatment |        |        | Risk of hypertension as a side-effect of treatment |        |        | Extension of time until cancer-related pain occurs |           |           | Risk of rashes as a side-effect of treatment |        |       |
|----------------------------------------------------|-----|-----------------------------------------------|--------|--------|---------------------------------------------------------|--------|--------|------------------------------------------------------------|--------|--------|----------------------------------------------------|--------|--------|----------------------------------------------------|-----------|-----------|----------------------------------------------|--------|-------|
|                                                    |     | 15%                                           | 25%    | 35%    | 3%                                                      | 10%    | 20%    | 0%                                                         | 5%     | 10%    | 5%                                                 | 15%    | 25%    | 15 months                                          | 35 months | 45 months | 5%                                           | 15%    | 25%   |
| Symptom scale: Urinary symptoms                    | 137 | 0.002                                         | 0.000  | -0.001 | -0.001                                                  | 0.001  | 0.000  | 0.003                                                      | 0.000  | -0.003 | -0.001                                             | 0.002  | -0.001 | 0.004                                              | -0.001    | -0.004    | -0.001                                       | 0.000  | 0.001 |
| p-value                                            |     | 0.455                                         | 0.896  | 0.567  | 0.848                                                   | 0.500  | 0.970  | 0.375                                                      | 0.865  | 0.380  | 0.367                                              | 0.065  | 0.745  | 0.291                                              | 0.530     | 0.329     | 0.722                                        | 0.938  | 0.709 |
| Symptom item: Incontinence aid                     | 36  | -0.004                                        | -0.001 | 0.006  | -0.007                                                  | -0.002 | 0.009  | -0.001                                                     | -0.001 | 0.002  | -0.004                                             | -0.001 | 0.004  | -0.005                                             | 0.000     | 0.005     | -0.009                                       | -0.001 | 0.010 |
| p-value                                            |     | 0.022                                         | 0.052  | 0.012  | 0.020                                                   | 0.103  | 0.003  | 0.741                                                      | 0.148  | 0.519  | 0.011                                              | 0.545  | 0.060  | 0.249                                              | 0.596     | 0.247     | 0.002                                        | 0.524  | 0.002 |
| Symptom scale: Bowel symptoms                      | 137 | -0.004                                        | -0.001 | 0.004  | -0.007                                                  | -0.001 | 0.009  | 0.004                                                      | -0.001 | -0.003 | -0.005                                             | 0.002  | 0.003  | 0.006                                              | 0.001     | -0.007    | -0.011                                       | -0.001 | 0.012 |
| p-value                                            |     | 0.256                                         | 0.603  | 0.280  | 0.144                                                   | 0.217  | 0.068  | 0.428                                                      | 0.564  | 0.487  | 0.020                                              | 0.233  | 0.368  | 0.303                                              | 0.366     | 0.195     | 0.013                                        | 0.370  | 0.006 |
| Symptom scale: Hormonal treatment-related symptoms | 137 | 0.004                                         | 0.000  | -0.004 | 0.004                                                   | 0.000  | -0.003 | -0.001                                                     | 0.001  | 0.000  | -0.002                                             | 0.000  | 0.002  | 0.001                                              | 0.003     | -0.004    | -0.002                                       | 0.000  | 0.002 |
| p-value                                            |     | 0.148                                         | 0.908  | 0.224  | 0.422                                                   | 0.725  | 0.451  | 0.894                                                      | 0.472  | 0.988  | 0.315                                              | 0.834  | 0.586  | 0.800                                              | 0.036     | 0.460     | 0.608                                        | 0.908  | 0.590 |
| Functional scales: Sexual activity                 | 137 | -0.002                                        | 0.000  | 0.003  | -0.004                                                  | 0.000  | 0.005  | 0.001                                                      | -0.003 | 0.002  | -0.004                                             | -0.004 | 0.007  | -0.002                                             | -0.001    | 0.003     | -0.002                                       | -0.002 | 0.004 |
| p-value                                            |     | 0.587                                         | 0.852  | 0.619  | 0.546                                                   | 0.843  | 0.498  | 0.850                                                      | 0.054  | 0.835  | 0.227                                              | 0.131  | 0.127  | 0.830                                              | 0.734     | 0.761     | 0.716                                        | 0.367  | 0.519 |
| Functional scales: Sexual functioning              | 1   | NA                                            | NA     | NA     | NA                                                      | NA     | NA     | NA                                                         | NA     | NA     | NA                                                 | NA     | NA     | NA                                                 | NA        | NA        | NA                                           | NA     | NA    |
